# Supplementary material for: Effect of the Deposition of Vanadium-Oxide on the Photocatalytic Activity of TiO2 Nanotubes and Its Photodiode Performance Interfaced with CH3NH3PbI3 Single Crystal
Source: MDPI journal article supplement (doi:10.3390/catal13020352), 2023-02-04
Supplement: s1 [file s1]

# **Effect of the deposition of vanadium-oxide on the photocatalytic activity of TiO<sub>2</sub> nanotubes and its photodiode performance interfaced with CH<sub>3</sub>NH<sub>3</sub>PbI<sub>3</sub> single crystal**

*Jelena Vujančević<sup>1\*†</sup>, Pavao Andričević<sup>2,3</sup>, Veljko Djokić<sup>2,4</sup>, Vladimir Blagojević<sup>5</sup>, Vera P. Pavlović<sup>6</sup>, Jovana Ćirković<sup>7</sup>, Endre Horváth<sup>2,8</sup>, László Forró<sup>2,9</sup>, Abdennaceur Karoui<sup>10</sup>, Vladimir B. Pavlović<sup>11</sup> and Djordje Janačković<sup>4</sup>*

<sup>1</sup> Institute of Technical Sciences of SASA, Knez Mihailova 35/IV, 11000 Belgrade, Serbia;

<sup>2</sup> Ecole Polytechnique Fédérale de Lausanne, Laboratory of Physics of Complex Matter, CH-1015 Lausanne, Switzerland;

<sup>3</sup> Department of Physics, Technical University of Denmark, DTU Risø Campus, 4000 Roskilde, Denmark

<sup>4</sup> University of Belgrade, Faculty of Technology and Metallurgy, Karnegijeva 4, 11120 Belgrade, Serbia

<sup>5</sup> TBP software, Solunska 11, 11000 Belgrade, Serbia

<sup>6</sup> University of Belgrade, Faculty of Mechanical Engineering, Kraljice Marije 16, 11120 Belgrade, Serbia

<sup>7</sup> University of Belgrade, Institute for Multidisciplinary Research, Kneza Višeslava 1, 11000 Belgrade, Serbia

<sup>8</sup> Haute école du paysage, d'ingénierie et d'architecture de Genève – HEPIA, 1202 Genève, Switzerland

<sup>9</sup> Department of Physics and Astronomy, University of Notre Dame, 433 Nieuwland Science Hall  
Notre Dame, IN 46556, USA

<sup>10</sup> North Carolina Central University, Department of Physics, 1801 Fayetteville St Durham, North Carolina 27707, USA

<sup>11</sup> University of Belgrade, Faculty of Agriculture, Nemanjina 6, 11080 Belgrade-Zemun, Serbia

\*Corresponding author. [jelena.vujancevic@itn.sanu.ac.rs](mailto:jelena.vujancevic@itn.sanu.ac.rs)

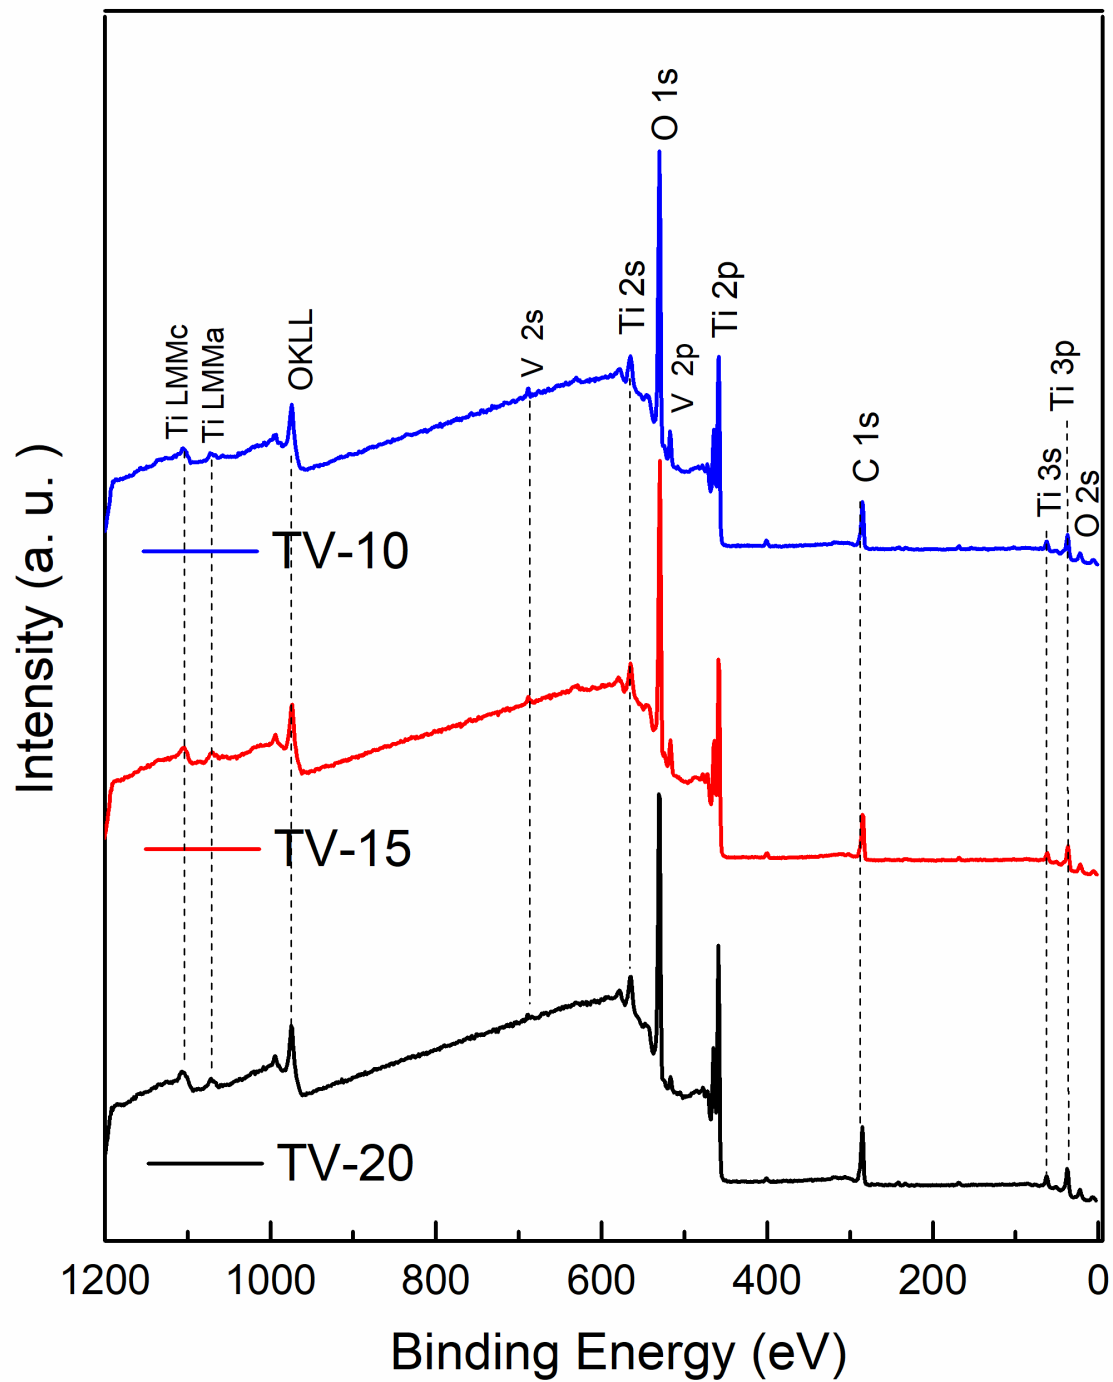

**Figure S1.** Survey XPS spectra of TiO<sub>2</sub> nanotubes after vanadium oxide deposition.

**Table S1.** Band gaps of the samples with and without vanadium oxide deposition.

| <b>Samples</b>      | <b>T-10</b> | <b>T-15</b> | <b>T-20</b> | <b>TV-10</b> | <b>TV-15</b> | <b>TV-20</b> |
|---------------------|-------------|-------------|-------------|--------------|--------------|--------------|
| <b>Band gap, eV</b> | 3.44        | 3.40        | 3.20        | 3.27         | 3.38         | 3.08         |
